# Supplementary material
Source: Springer Nature journal article supplement (https://www.springermedizin.de/resource/supplementary/12894_2012_218_MOESM1_ESM.pdf/9513234)
Supplement: MOESM1 [file 9513234]

| Exon | SNP                                        | Sample minor allele freq. | Expected minor allele freq. | SNP                                       | Sample minor allele freq. | Expected minor allele freq. | SNP                                   | Sample minor allele freq. | Expected minor allele freq. |
|------|--------------------------------------------|---------------------------|-----------------------------|-------------------------------------------|---------------------------|-----------------------------|---------------------------------------|---------------------------|-----------------------------|
| 10   | <b>rs10167688</b><br>[C1062A; P324T]       | 0.00                      | 0.00                        | <b>rs115473269</b><br>[T11116A ; Y342N]   | 0.00                      | unknown                     | <b>rs61752199</b><br>[G11159A; S356N] | 0.00                      | .033*                       |
| 11   | <b>rs2248214</b><br>[5' -3 G/T]            | 0                         | unknown                     | <b>rs2042791</b><br>[A1175C ; Q361H]      | .408                      | 0.39                        | <b>rs2042792</b><br>[3' +15 C/G]      | .333                      | 0.39                        |
| 12   | <b>rs114135655</b><br>[5' -26 G/C]         | 0                         | unknown                     | <b>rs28606463</b><br>[5' -25 C/T]         | 0.00                      | unknown                     | <b>rs12623569</b><br>[A1366C; K425T]  | .308                      | 0.28                        |
| 13   | no known/detected SNPs                     |                           |                             |                                           |                           |                             |                                       |                           |                             |
| 14   | <b>rs113852644</b><br>[A1663G; N524S]      | 0.00                      | unknown                     | <b>rs117619722</b><br>[3' +12 C/T]        | 0.00                      | unknown                     | <b>rs16851495</b><br>[3' +25 G/A]     | .142                      | .08                         |
| 15   | <b>rs71855401</b><br>[5' -31 2bp delet]    | 0.00                      | unknown                     | <b>rs6746741</b><br>[T1715C; no mutation] | 0                         | 0                           |                                       |                           |                             |
| 16   | <b>rs12988372</b><br>[C1946T; no mutation] | 0.00                      | unknown                     | <b>rs12988374</b><br>[C1951T; S620F]      | 0.00                      | unknown                     | <b>rs80016542</b><br>[G1975A; R628Q]  | 0.00                      | unknown                     |
